# Supplementary material for: Back to the Basics of SARS-CoV-2 Biochemistry: Microvascular Occlusive Glycan Bindings Govern Its Morbidities and Inform Therapeutic Responses
Source: MDPI journal article supplement (doi:10.3390/v16040647), 2024-04-22
Supplement: s1 [file s1]

# Back to the Basics of SARS-CoV-2 Biochemistry: Microvascular Occlusive Glycan Bindings Govern its Morbidities and Inform Therapeutic Responses

## Supplementary Tables

**Table S1.** Changes in SpO2 for 34 COVID-19 patients treated with IVM, doxycycline and zinc, as reported by Stone et al. (2022) [1]. For the elapsed times of x=12, 24, and 48 hours after first IVM dose, the SpO2 value shown for a given patient is that at the latest post-treatment time  $\leq x$ . All pre-treatment SpO2 values are from within one hour before treatment. All patients were on room air (without oxygen supplementation) and all had pretreatment SpO2  $\leq 93\%$ .

| Age       | Sex | SpO2 (%)      |              |              |              |
|-----------|-----|---------------|--------------|--------------|--------------|
|           |     | Pre-treatment | at +12 hours | at +24 hours | at +48 hours |
| 25        | M   | 79            | 92           | 93           | 93           |
| 32        | F   | 88            | 95           | 95           | 95           |
| 35        | M   | 87            | 95           | 95           | 95           |
| 37        | M   | 92            | 99           | 99           | 98           |
| 38        | F   | 76            | 88           | 89           | 91           |
| 40        | F   | 93            | -            | 99           | 99           |
| 42        | M   | 90            | 90           | 90           | 93           |
| 44        | F   | 89            | 93           | 93           | 93           |
| 44        | M   | 87            | 93           | 93           | 94           |
| 45        | M   | 83            | 96           | 95           | 95           |
| 49        | F   | 66            | 90           | 90           | 90           |
| 50        | F   | 89            | 93           | 93           | 93           |
| 50        | M   | 92            | -            | 95           | 95           |
| 52        | F   | 90            | 93           | 93           | 93           |
| 55        | F   | 82            | -            | -            | 91           |
| 55        | M   | 81            | -            | 88           | 92           |
| 56        | F   | 87            | 93           | 94           | 94           |
| 57        | F   | 84            | -            | 89           | 88           |
| 58        | M   | 85            | 94           | 94           | 94           |
| 58        | M   | 89            | 95           | 95           | 95           |
| 59        | M   | 79            | 82           | 85           | 85           |
| 59        | M   | 92            | 93           | 93           | 93           |
| 61        | F   | 87            | -            | 98           | 99           |
| 61        | F   | 92            | -            | 96           | 96           |
| 62        | M   | 88            | 89           | 93           | 91           |
| 62        | M   | 91            | 94           | 94           | 94           |
| 66        | M   | 85            | 84           | 84           | 84           |
| 66        | M   | 88            | 94           | 94           | 94           |
| 68        | M   | 89            | 95           | 95           | 95           |
| 68        | M   | 90            | -            | 96           | 96           |
| 71        | F   | 89            | -            | 94           | 95           |
| 75        | M   | 80            | 92           | 90           | 90           |
| 80        | F   | 85            | 91           | 91           | 91           |
| $\geq 90$ | M   | 88            | 95           | 98           | 98           |

**Table S2.** Changes in SpO2 for 19 COVID-19 patients treated with IVM, doxycycline and zinc as reported by Hazan et al. (2021) [2]. The data shown are for the 19 of 24 patients who had SpO2 values recorded within 24 hours after first IVM dose, and whose pre-treatment SpO2 was  $\leq 93\%$ ; this excludes one patient with a pre-treatment SpO2 value of 97%; the rest actually all have pretreatment SpO2 values  $\leq 90\%$ ). All patients were on room air (without oxygen supplementation).

| Age | Sex | SpO2 (%)      |                  |
|-----|-----|---------------|------------------|
|     |     | Pre-treatment | within +24 hours |
| 66  | M   | 90.0          | 94.0             |
| 62  | M   | 77.0          | 87.0             |
| 75  | M   | 88.0          | 96.0             |
| 66  | F   | 89.0          | 95.0             |
| 43  | F   | 88.0          | 94.0             |
| 62  | M   | 86.5          | 91.0             |
| 57  | M   | 88.0          | 96.0             |
| 94  | F   | 88.0          | 94.0             |
| 63  | F   | 90.0          | 96.0             |
| 47  | M   | 84.0          | 91.0             |
| 69  | F   | 88.0          | 91.0             |
| 69  | M   | 88.0          | 91.0             |
| 46  | F   | 87.0          | 94.0             |
| 86  | M   | 88.0          | 95.0             |
| 59  | F   | 90.0          | 95.0             |
| 92  | M   | 85.0          | 91.0             |
| 63  | M   | 90.0          | 96.0             |
| 57  | M   | 73.0          | 90.0             |
| 87  | M   | 90.0          | 95.0             |

**Table S3.** Changes in SpO2 for 19 COVID-19 patients treated with IVM, zinc and vitamin C, with some also given azithromycin and hydroxychloroquine, as reported by Babalola et al. (2021) [3,4]. The data shown are for the 19 patients with pre-treatment SpO2 values  $\leq 93\%$  and who were on room air (without oxygen supplementation).

| Age | Sex | SpO2 (%)      |           |            |
|-----|-----|---------------|-----------|------------|
|     |     | Pre-treatment | at +1 day | at +2 days |
| 29  | M   | 93            | 92        | 93         |
| 34  | M   | 92            | 94        | 94         |
| 60  | F   | 92            | 94        | 97         |
| 34  | m   | 90            | 90        | 90         |
| 33  | F   | 78            | 90        | 97         |
| 43  | M   | 92            | 94        | 96         |
| 32  | M   | 92            | 90        | 94         |
| 23  | M   | 90            | 94        | 94         |
| 19  | F   | 90            | 92        | 92         |
| 21  | F   | 90            | 90        | 92         |
| 48  | M   | 89            | 99        | 88         |
| 33  | F   | 92            | 92        | 92         |
| 24  | M   | 92            | 92        | 94         |
| 32  | F   | 92            | 92        | 92         |
| 32  | M   | 90            | 90        | 94         |
| 89  | M   | 91            | 92        | 94         |
| 56  | M   | 92            | 96        | 97         |
| 41  | F   | 92            | 93        | 94         |
| 32  | M   | 76            | 89        | 89         |

**Table S4.** Changes in SpO2 for 26 COVID-19 patients treated without IVM, using different combinations of lopinavir/ritonavir, remdesivir, azithromycin, enoxaparin, zinc sulfate and vitamin C, as reported by Thairu et al. (2022) [4,5]. The data shown are for the 26 patients with pre-treatment SpO2 values  $\leq 93\%$ . Those (7 patients) who had oxygen supplementation are highlighted in yellow, and one on ventilation is highlighted in pink. The other 18 were on room air.

| Age | Sex | SpO2 (%)      |           |            |
|-----|-----|---------------|-----------|------------|
|     |     | Pre-treatment | at +1 day | at +2 days |
| 45  | F   | 88            | 88        | 88         |
| 35  | F   | 88            | 88        | 87         |
| 63  | F   | 81            | 81        | 82         |
| 47  | M   | 91            | 88        | 85         |
| 52  | M   | 91            | 91        | 91         |
| 41  | F   | 88            | 88        | 84         |
| 45  | F   | 87            | 87        | 87         |
| 54  | M   | 88            | 88        | 88         |
| 36  | F   | 88            | 87        | 88         |
| 54  | F   | 84            | 84        | 83         |
| 54  | M   | 88            | 88        | 88         |
| 38  | F   | 87            | 88        | 88         |
| 55  | M   | 84            | 84        | 84         |
| 32  | M   | 82            | 83        | 82         |
| 58  | M   | 88            | 88        | 87         |
| 58  | M   | 88            | 88        | 88         |
| 44  | M   | 88            | 88        | 88         |
| 32  | M   | 88            | 88        | 88         |
| 25  | M   | 88            | 88        | 88         |
| 49  | M   | 86            | 88        | 88         |
| 26  | M   | 88            | 85        | 88         |
| 59  | M   | 88            | 87        | 87         |
| 45  | F   | 88            | 88        | 89         |
| 39  | M   | 84            | 84        | 84         |
| 45  | M   | 88            | 85        | 85         |
| 35  | M   | 88            | 84        | 84         |

**Table S5.** Means and standard errors of spo2 changes from day 0 to day 1 and from day 0 to day 2 for the full set of 26 patients from Thairu et al. (2022) and for the subset of 18 patients who were on room air (without oxygen supplementation or ventilation).

|                             |                | Change in SpO2 (%) |                |
|-----------------------------|----------------|--------------------|----------------|
|                             |                | Day 0 to Day 1     | Day 0 to Day 2 |
| All 26 patients             | Mean           | -0.423             | -0.615         |
|                             | Standard Error | 0.267              | 0.347          |
| The 18 patients on room air | Mean           | -0.500             | -0.556         |
|                             | Standard Error | 0.381              | 0.459          |

## **References**

1. Stone, J.C.; Ndarukwa, P.; Scheim, D.E.; Dancis, B.M.; Dancis, J.; Gill, M.G.; Aldous, C. Changes in SpO<sub>2</sub> on Room Air for 34 Severe COVID-19 Patients after Ivermectin-Based Combination Treatment: 62% Normalization within 24 Hours. *Biologics* **2022**, *2*, 196-210.
2. Hazan, S.; Dave, S.; Gunaratne, A.W.; Dolai, S.; Clancy, R.L.; McCullough, P.A.; Borody, T.J. Effectiveness of ivermectin-based multidrug therapy in severely hypoxic, ambulatory COVID-19 patients. *Future Microbiology* **2022**, *17*, 339-350.
3. Babalola, O.E.; Ndanusa, Y.; Adesuyi, A.; Ogedengbe, O.J.; Thairu, Y.; Ogu, O. A Randomized Controlled Trial of Ivermectin Monotherapy Versus HCQ, IVM, and AZ Combination Therapy in Covid-19 Patients in Nigeria. *J Infect Dis Epidemiol* **2021**, *7*, 233.
4. Babalola, O.E.; (Bingham University, New Karu, Nigeria). Personal communications, 28 February 2022, 26 January, 2024.
5. Thairu, Y.; Babalola, O.E.; Ajayi, A.A.; Ndanusa, Y.; Ogedengbe, J.O.; Omede, O. A comparison of Ivermectin and Non Ivermectin based regimen for covid 19 in Abuja: effects on virus clearance, Days-to-Discharge and Mortality. *Journal of Pharmaceutical Research International* **2022**, *34*, 1-19.
